# Supplementary material
Source: PubMed Central journal article supplement (PMC4666385)
Supplement: supp_gkv738_nar-01065-met-g-2015-File006.pdf [file supp_gkv738_nar-01065-met-g-2015-File006.pdf]

## Supplementary Methods

### Generation of calibration curve using 76-mer probes

76-mer 4mC containing model DNA was generated as described above with 4mdCTP.                      Template                      sequence:                      5'-

CCTCACCATCTCAACCAATATTATATTATGTGTATATTCGATATTTTGTGTTAT

AATATTGAGGGAGAAGTGGTGA;                      forward                      primer:                      5'-

CCTCACCATCTCAACCAATA; reverse primer: 5'-TCACCACTTCTCCCTCAAT.

76-mer dsDNA with 4mC was mixed with the same 76-mer dsDNA with no cytosine modification at different ratio (0%, 25%, 50%, 75%, 100%) and subject to 4mC-TAB-Seq.

## Supplementary Results

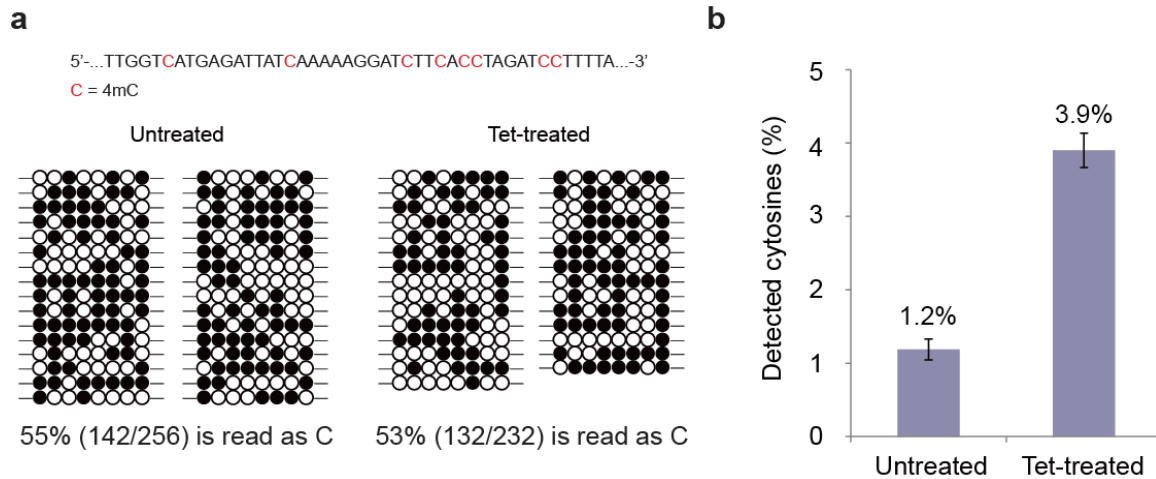

Figure S1. Tet has a weak demethylation activity towards 4mC. (a) Either untreated or Tet-treated 4mC-containing 304 bp model DNA was applied to optimized bisulfite conditions. After purification, the bisulfite-treated templates were amplified and the PCR products were applied to TOPO cloning, colony picking and Sanger sequencing. The 'C' reads were counted at each of eight total modification sites. Open circles represent the 4mCs read as T and black-filled circles represent the 4mCs read as C. (b) Quantification of unmodified cytosine on 4mC-containing model DNA generated with 4mdCTP by LC-MS/MS. The abundance of unmodified cytosines increased by ~2% after Tet treatment, indicating a slight, but detectable 4mC demethylation. Error bars indicate mean  $\pm$  s.d., n = 3.

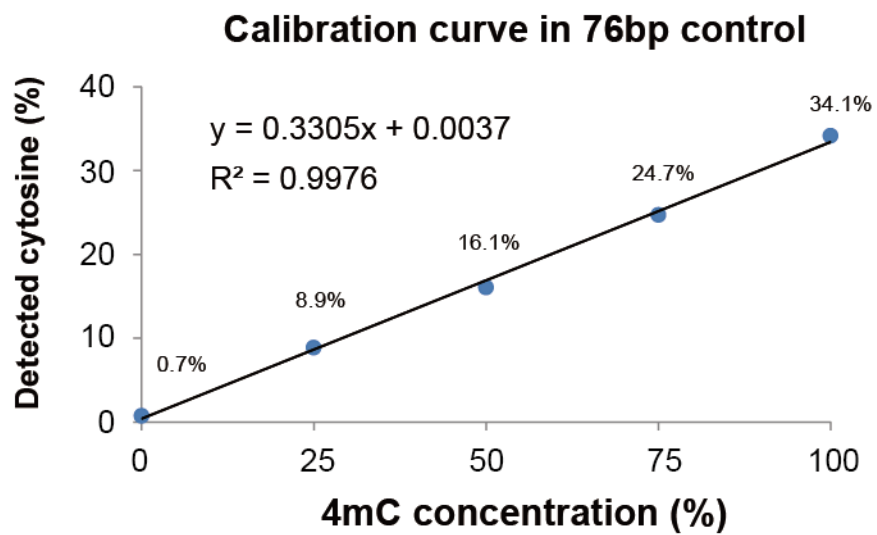

Figure S2. 4mC-TAB-seq results of 76-mer probes with variable 4mC content.



Figure S3. Motif sequence conservation analysis. Sequence conservation was evaluated for flanking 30 bases of each revealed motif in both upstream and downstream by calculating entropy dynamics in each position.

Table S1. Summary of mapping information.

| <i>C. kristjanssonii</i> | Non-clonal mapped Reads |        | Detected Cytosine |       | Genome Coverage |
|--------------------------|-------------------------|--------|-------------------|-------|-----------------|
| <b>Untreated</b>         | 1,491,660               | 57.91% | 971,460           | 96.6% | 78.9            |
| <b>Tet treated</b>       | 1,032,169               | 61.21% | 970,708           | 96.5% | 54.6            |

Table S2. Motif distribution in *C. kristjanssonii* using SMRTsequencing

| Type                       | Motif             | Total number<br>in the genome | methylated<br>number | Fraction |
|----------------------------|-------------------|-------------------------------|----------------------|----------|
| 6mA                        | G <u>A</u> TC     | 3108                          | 3101                 | 99.77%   |
| 6mA                        | CGD <u>A</u> G    | 3591                          | 3578                 | 99.64%   |
| 6mA                        | CC <u>A</u> TTY   | 4041                          | 3927                 | 97.18%   |
| 4mC                        | GG <u>C</u> C     | 2990                          | 2961                 | 99.03%   |
| 4mC                        | RCC <u>C</u> C    | 2908                          | 2827                 | 97.21%   |
| suspected<br>modified base | G <u>C</u> NGCVGC | 536                           | 439                  | 81.90%   |

D: A, G, or T

Y: C or T

R: A or G
